# Supplementary material
Source: publisher figshare collection journal article supplement (https://frontiersin.figshare.com/ndownloader/files/13268510)
Supplement: Supplementary file [file 13268510]

Suppl. Table 1. Whole brain and occipital lobe grey matter (GM) and white matter (WM) volumes. Mean and standard deviation was calculated based on the tissue volumes of the healthy controls using the Dartel modulated segmented images.

|                                | GM whole tissue | WM whole tissue | GM Locc     | GM Locc     | GM Rocc      | GM Rocc     |
|--------------------------------|-----------------|-----------------|-------------|-------------|--------------|-------------|
| CW second T1                   | 0.86            | 0.75            | 0.54        | 0.45        | 0.56         | 0.44        |
|                                |                 |                 |             |             |              |             |
| Mean (st dev) in controls only | 0.84 (0.02)     | 0.70 (0.03)     | 0.47 (0.06) | 0.41 (0.02) | 0.493 (0.02) | 0.40 (0.01) |
| <i>CW first T1</i>             | <i>0.78</i>     | <i>0.62</i>     | <i>0.48</i> | <i>0.40</i> | <i>0.50</i>  | <i>0.40</i> |
